# Supplementary material for: Biomarker-Based Ovarian Carcinoma Typing: A Histologic Investigation in the Ovarian Tumor Tissue Analysis Consortium
Source: Oxford University Press journal article supplement (doi:10.1158/1055-9965.epi-13-0391), 2013-07-24
Supplement: 10559965epi130391-sup-tabs_1-9_pdf100k.pdf [file 10559965epi130391-sup-tabs_1-9_pdf100k.pdf]

## Supplemental Tables

**Table S1** Demographics from the OTTA cohorts representing the test set and excluded cases

|                                                              |         |                                                                | MAY            | UKO          | HOP          |
|--------------------------------------------------------------|---------|----------------------------------------------------------------|----------------|--------------|--------------|
| Testing set (N=524)                                          | N       |                                                                | 428            | 86           | 10           |
|                                                              | Age     | Mean (Range) years                                             | 61.9 (21-93)   | 61.5 (32-90) | 50.2 (38-67) |
|                                                              | Type    | HGSC                                                           | 292 (68%)      | 44 (51%)     | 0            |
|                                                              |         | EC                                                             | 77 (18%)       | 11 (13%)     | 9 (90%)      |
|                                                              |         | CCC                                                            | 30 (7%)        | 16 (19%)     | 1 (10%)      |
|                                                              |         | MC                                                             | 14 (3%)        | 8 (9%)       | 0            |
|                                                              |         | LGSC                                                           | 15 (3%)        | 7 (8%)       | 0            |
|                                                              | Stage   | I/II                                                           | 94 (22%)       | 44 (51%)     | 9 (90%)      |
|                                                              |         | III/IV                                                         | 333 (78%)      | 42 (49%)     | 1 (10%)      |
|                                                              | Outcome | Median follow time up for censored patients, (range) in months | 52 (1.8 – 140) | 56 (43-121)  | N/A          |
|                                                              |         | N of deaths                                                    | 251            | 33           | NA           |
|                                                              |         | 5-year survival rate                                           | 43%            | 59%          | NA           |
|                                                              |         |                                                                |                |              |              |
| Excluded cases based on missing IHC (N=117)*                 | N       |                                                                | 96             | 15           | 6            |
|                                                              | Type    | HGSC                                                           | 66 (69%)       | 10 (66%)     | 0            |
|                                                              |         | EC                                                             | 11 (11%)       | 1 (7%)       | 0            |
|                                                              |         | CCC                                                            | 6 (6%)         | 0            | 0            |
|                                                              |         | MC                                                             | 5 (5%)         | 2 (13%)      | 0            |
|                                                              |         | LGSC                                                           | 5 (5%)         | 1 (7%)       | 0            |
|                                                              |         | Mixed                                                          | 3 (3%)         | 0            | 3 (50%)      |
|                                                              |         | other                                                          | 0              | 1 (7%)       | 1 (17%)      |
|                                                              |         | SC ungraded                                                    | 0              | 0            | 2 (33%)      |
|                                                              |         |                                                                |                |              |              |
| Excluded cases based on COSP incompatible original pathology | N       |                                                                | 20             | 18           | 33           |

|          |      |                  |          |         |          |
|----------|------|------------------|----------|---------|----------|
| (N=71)** |      |                  |          |         |          |
|          | Type | SC ungraded      | 3 (15%)  | 6 (33%) | 26 (79%) |
|          |      | Mixed            | 14 (70%) | 2 (11%) | 3 (9%)   |
|          |      | Other            | 0        | 7 (39%) | 4 (12%)  |
|          |      | Undifferentiated | 1 (5%)   | 1 (6%)  | 0        |
|          |      | Unknown          | 2 (10%)  | 2 (11%) | 0        |

\* Cases without the original diagnosis of one of the five major types

\* Cases with incomplete immunostaining data on at least one of ten markers tested

N/A not available

**Table S2** Antibodies, details of immunohistochemical protocols and scoring cut-off

| Marker     | Supplier         | Clone | Antigen retrieval | Primary dilution | Amplification step         | Categorized as Negative                                                 | Categorized as Negative                                                     | Background information                                                                                                         |
|------------|------------------|-------|-------------------|------------------|----------------------------|-------------------------------------------------------------------------|-----------------------------------------------------------------------------|--------------------------------------------------------------------------------------------------------------------------------|
| ARID1A     | Abgent           | 3H2   | CC1-std           | 1:50             | UltraMap anti-Ms HRP 16min | Retained staining in $\geq 10\%$ of tumor cells                         | Reduced staining in $< 10\%$ of tumor cells                                 | ARID1A is part of a chromatin remodelling complex mutated in EC and CCC, with subsequent loss of expression.                   |
| DKK1       | R&D Systems      | Poly  | Prot2-8m          | 1:25             | UltraMap anti-Rb HRP 16min | Absence of staining                                                     | Any staining $\geq 1\%$ of tumor cells                                      | Dickkopf-related protein 1 is an inhibitor of the Wnt signalling pathway, which is altered in a subset of EC.                  |
| HNF1B      | Sigma            | Poly  | CC1-std           | 1:100            | Universal Secondary        | Absence or focal in $< 50\%$ of tumor cells                             | Diffuse staining $\geq 50\%$ of tumor cells*                                | Hepatocyte nuclear factor 1B is a CCC cell lineage marker.                                                                     |
| MDM2       | Zymed            | IF2   | CC1-std           | 1:50             | UltraMap anti-Ms HRP 16min | Absence of staining                                                     | Any staining $\geq 1\%$ of tumor cells                                      | MDM2 is involved in ubiquitination of wild type TP53.                                                                          |
| CDKN2A/p16 | mtm laboratories | E6H4  | CC1-std           | 1:2              | UltraMap anti-Ms HRP 16min | Absence or patchy in $< 90\%$ of tumor cells                            | Block staining $\geq 90\%$ of tumor cells                                   | The cyclin dependent kinase inhibitor 2A is overexpressed in highly proliferative tumors as futile attempt to stop cell cycle. |
| TP53       | Dako             | DO-7  | CC1-std           | 1:400            | Universal secondary        | Wild type pattern with nuclear staining between $\geq 1\%$ and $< 50\%$ | Complete absence of staining or or diffuse staining in $\geq 50\%$ of tumor | The tumor suppressor gene TP53 is ubiquitously mutated in HGSC.                                                                |

|      |         |       |          |      |                     |                                         |                                             |                                                                                                                       |
|------|---------|-------|----------|------|---------------------|-----------------------------------------|---------------------------------------------|-----------------------------------------------------------------------------------------------------------------------|
|      |         |       |          |      |                     |                                         | cells                                       |                                                                                                                       |
| PGR  | Ventana | 1E2   | CC1-std  | 1:1  | Universal secondary | Absence of staining                     | Any staining $\geq$ 1% of tumor cells       | Hormone receptor highly expressed in EC.                                                                              |
| TFF3 | Abnova  | 3D9   | CC2-std  | 1:50 | Universal secondary | Absence or focal in <50% of tumor cells | Diffuse staining $\geq$ 50% of tumor cells* | Trefoil factor 3 is a marker of mucinous gastrointestinal epithelium and therefore a marker for MC.                   |
| VIM  | Zymed   | V9    | CC2-mild | 1:50 | Universal secondary | Absence or focal in <50% of tumor cells | Diffuse staining $\geq$ 50% of tumor cells* | Vimentin is an intermediate filament expressed in mesenchymal cells as well as normal endometrium and a subset of EC. |
| WT1  | Dako    | 6F-H2 | CC1-std  | 1:50 | Universal secondary | Absence of staining                     | Any staining $\geq$ 1% of tumor cells       | Wilms tumor gene 1 is very sensitive and specific serous cell lineage marker.                                         |

Std-standard

\* Changes to the scoring categories in comparison to TB\_COSPv1, in which any staining  $\geq$  1% of tumor cells was considered positive.

**Table S3** Training set revision of the COSP model – Areas under the curve (AUC) by histology and model

|      | A COSP* | TB COSPv1* | TB COSPv2 |
|------|---------|------------|-----------|
| HGSC | 0.981   | 0.982      | 0.999     |
| EC   | 0.978   | 0.991      | 0.999     |
| CCC  | 0.994   | 0.995      | 0.999     |
| MC   | 0.993   | 0.999      | 0.999     |
| LGSC | 0.991   | 0.981      | 0.998     |

\* Previously published (24) A\_COSP, archival based calculator for ovarian carcinoma subtype probability, TB\_COSPv2, tumor bank based calculator for ovarian carcinoma subtype probability version 2; N=253 tumor bank cohort; HGSC-high-grade serous carcinoma, EC-endometrioid carcinoma, CCC-clear cell carcinoma, MC-mucinous carcinoma, LGSC-low-grade serous carcinoma

Table S4 Test for heterogeneity for marker expression between training and testing set

| Marker | HGSC |      |                   | LGSC |      |       | EC   |      |               | CCC  |      |        | MC   |      |      |
|--------|------|------|-------------------|------|------|-------|------|------|---------------|------|------|--------|------|------|------|
|        | TR   | TE   | p                 | TR   | TS   | p     | TR   | TS   | p             | TR   | TS   | p      | TR   | TS   | p    |
| ARID1A | 2.3  | 1.8  | 0.68              | 11.1 | 13.8 | 0.84  | 22.6 | 22.5 | 0.99          | 31.2 | 60.5 | 0.012  | 0    | 4.7  | 0.59 |
| CDKN2A | 58.3 | 64.6 | 0.16              | 0    | 17.2 | 0.18  | 6.5  | 19.1 | 0.097         | 9.4  | 4.6  | 0.42   | 16.7 | 19.0 | 0.89 |
| DKK1   | 0    | 12.6 | <b>&lt;0.0001</b> | 0    | 0    |       | 41.9 | 61.8 | 0.054         | 0    | 18.6 | 0.0098 | 0    | 28.6 | 0.14 |
| HNF1B  | 0.6  | 0.6  | 0.99              | 0    | 10.3 | 0.31  | 0    | 13.5 | 0.031         | 87.5 | 72.1 | 0.10   | 16.7 | 42.9 | 0.24 |
| MDM2   | 2.3  | 16.4 | <b>&lt;0.0001</b> | 44.4 | 58.6 | 0.45  | 35.5 | 61.2 | <b>0.0040</b> | 75.0 | 58.1 | 0.13   | 0    | 0    |      |
| PGR    | 30.3 | 31.3 | 0.82              | 44.4 | 68.9 | 0.18  | 77.5 | 77.5 | 0.99          | 0    | 0    |        | 0    | 14.3 | 0.32 |
| TFF3   | 1.1  | 0.6  | 0.49              | 0    | 31.0 | 0.055 | 33.3 | 43.8 | 0.26          | 0    | 2.3  | 0.38   | 83.3 | 66.7 | 0.43 |
| TP53 0 | 30.9 | 27.8 | 0.43              | 11.1 | 13.8 | 0.83  | 3.2  | 11.2 | 0.31          | 9.4  | 14.0 | 0.43   | 16.7 | 19.1 | 0.87 |
| TP53 2 | 62.9 | 62.9 |                   | 0    | 3.4  |       | 6.5  | 10.1 |               | 3.1  | 0    |        | 33.3 | 40.8 |      |
| VIM    | 8.6  | 3.8  | 0.023             | 33.3 | 20.7 | 0.43  | 48.4 | 23.6 | 0.0095        | 9.4  | 2.3  | 0.18   | 0    | 0    |      |
| WT1    | 92.0 | 94.7 | 0.22              | 100  | 100  |       | 3.2  | 15.7 | 0.069         | 0    | 0    |        | 0    | 19.4 | 0.25 |

TR training set. TE testing set. Bold: significant p-value <0.005 after adjusting for multiple comparison (Bonferroni)

**Table S5** Pairwise agreement of histological types in the testing set by classification method for A\_COSP

|               |      | A_COSP     |            |           |           |           |          |                  |                           |
|---------------|------|------------|------------|-----------|-----------|-----------|----------|------------------|---------------------------|
|               |      | All        | HGSC       | EC        | CCC       | MC        | LGSC     | Concordance Rate | Cohen's $\kappa$ (95% CI) |
| Original type | All  | <b>524</b> | 361        | 84        | 61        | 15        | 3        | 75%              | 0.516 (0.451-0.581)       |
|               | HGSC | 336        | <b>301</b> | 19        | 13        | 2         | 1        | 90%              |                           |
|               | EC   | 97         | 39         | <b>47</b> | 9         | 2         | 0        | 48%              |                           |
|               | CCC  | 47         | 6          | 6         | <b>34</b> | 1         | 0        | 73%              |                           |
|               | MC   | 22         | 4          | 6         | 3         | <b>9</b>  | 0        | 41%              |                           |
|               | LGSC | 22         | 11         | 6         | 2         | 1         | <b>2</b> | 9%               |                           |
|               |      | A_COSP     |            |           |           |           |          |                  |                           |
|               |      | All        | HGSC       | EC        | CCC       | MC        | LGSC     | Concordance Rate | Cohen's $\kappa$ (95% CI) |
| TB_COSPV2     | All  | <b>524</b> | 361        | 84        | 61        | 15        | 3        | 88%              | 0.739 (0.686-0.792)       |
|               | HGSC | 342        | <b>331</b> | 1         | 10        | 0         | 0        | 97%              |                           |
|               | EC   | 89         | 5          | <b>73</b> | 8         | 3         | 0        | 82%              |                           |
|               | CCC  | 43         | 0          | 6         | <b>36</b> | 1         | 0        | 84%              |                           |
|               | MC   | 21         | 4          | 4         | 2         | <b>11</b> | 0        | 52%              |                           |
|               | LGSC | 29         | 21         | 0         | 5         | 0         | <b>3</b> | 10%              |                           |

HGSC-high-grade serous carcinoma, EC-endometrioid carcinoma, CCC-clear cell carcinoma, MC-mucinous carcinoma, LGSC-low-grade serous carcinoma

**Table S6** Univariate Cox model in the testing set comparing A\_COPS and TB\_COSPv2.

|                    |                                     | A_COSP                     | TB_COSPv2                  |
|--------------------|-------------------------------------|----------------------------|----------------------------|
| Histological type* | HGSC (Reference)<br>p-value overall | 1.00,<br>p<0.0001          | 1.00,<br>p<0.001           |
|                    | EC                                  | 0.43 (0.28-0.64), p<0.001  | 0.35 (0.22 -0.52), p<0.001 |
|                    | CCC                                 | 0.57 (0.37-0.85), p=0.0047 | 0.56 (0.33-0.88), p=0.010  |
|                    | MC                                  | 0.52 (0.18-1.30), p=0.10   | 0.80 (0.41-1.40), p=0.46   |
|                    | LGSC                                | instable                   | 0.59 (0.33-0.97), p=0.038  |

HGSC-high-grade serous carcinoma, EC-endometrioid carcinoma, CCC-clear cell carcinoma, MC-mucinous carcinoma, LGSC-low-grade serous carcinoma. Significant p-value highlighted in bold.



**Table S7** Five-year survival estimates for four different type assignments as defined in the text within histological types

|      | Original type   |            | TB_COSPv2       |            | Agreement between original type and TB_COSPv2 |            | Agreement between 2 out of 3 methods of original type, TB_COSPv2 and WT1-assisted core review |            |
|------|-----------------|------------|-----------------|------------|-----------------------------------------------|------------|-----------------------------------------------------------------------------------------------|------------|
|      | No/No of events | 5y-OS (SE) | No/No of events | 5y-OS (SE) | No/No of events                               | 5y-OS (SE) | No/No of events                                                                               | 5y-OS (SE) |
| HGSC | 334/ 214        | 39% (2.9)  | 337/ 216        | 36% (2.9)  | 286/ 185                                      | 36% (3.2)  | 339/ 219                                                                                      | 36%/ 2.9   |
| EC   | 88/ 35          | 59% (5.8)  | 83/ 25          | 71% (5.4)  | 43/ 7                                         | 87% (5.5)  | 60/ 14                                                                                        | 80%/ 5.5   |
| CCC  | 46/ 18          | 59% (8.2)  | 42/ 18          | 66% (7.4)  | 28/ 9                                         | 70% (8.8)  | 44/ 20                                                                                        | 56%/ 8.2   |
| LGSC | 22/ 10          | 37% (14.3) | 29/ 14          | 62% (9.6)  | 8/ 2                                          | 70% (18.2) | 21/ 7                                                                                         | 67%/ 11.1  |
| MC   | 22/ 7           | 71% (9.9)  | 21/11           | 57% (11.9) | 8/2                                           | 73% (16.5) | 17/ 6                                                                                         | 61%/ 12.9  |

5y-OS - five year survival rate; SE – standard error; HGSC-high-grade serous carcinoma, EC-endometrioid carcinoma, CCC-clear cell carcinoma, MC-mucinous carcinoma, LGSC-low-grade serous carcinoma

**Table S8** Demographics of endometrioid carcinomas in the test set classified by different methods

|                      | Original type | TB_COSPv2    | Agreement between original type and TB_COSPv2 | Majority of original type, TB_COSPv2 and WT1-assisted core review | Reference (21) |
|----------------------|---------------|--------------|-----------------------------------------------|-------------------------------------------------------------------|----------------|
| No                   | 97            | 88           | 49                                            | 54                                                                | 139            |
| Age (Mean)           | 58.0          | 57.1 (0.58)  | 56.8 (p=0.53)                                 | 57.5 (0.77)                                                       | 54.2           |
| FIGO Stage III or IV | 46%           | 37% (0.19)   | 20% (p=0.0022)                                | 27% (p=0.011)                                                     | 5%             |
| Grade 3              | 50%           | 43% (0.65)   | 26% (p=0.050)                                 | 40% (p=0.46)                                                      | N/A            |
| WT1 positivity       | 40%           | 16% (0.0002) | 8% (p<0.0001)                                 | 6% (p<0.0001)                                                     | 4%             |
| 5y-OS                | 59%           | 71% (p=0.31) | 87% (p=0.011)                                 | 80% (p=0.10)                                                      | 87%            |

5y-OS – five year survival rate. N/A not available. P-value refer to pair wise comparison with original type.

**Table S9** Prediction of type in test set among cases with unclear original diagnosis (N=71)

|           |       | Original type |       |       |                  |                           |       |       |
|-----------|-------|---------------|-------|-------|------------------|---------------------------|-------|-------|
|           |       | Unknown       | Mixed | Other | Undifferentiated | Serous carcinoma ungraded | TOTAL | 5y-OS |
| TB_COSPV2 | HGSC  | 1             | 10    | 10    | 2                | 28                        | 51    | 39%   |
|           | EC    | 2             | 6     | 0     | 0                | 0                         | 8     | 71%   |
|           | LGSC  | 0             | 0     | 0     | 0                | 7                         | 7     | 100%  |
|           | CCC   | 0             | 2     | 1     | 0                | 0                         | 3     | 67%   |
|           | MC    | 1             | 1     | 0     | 0                | 0                         | 2     | 0%    |
|           | TOTAL | 4             | 19    | 11    | 2                | 35                        | 71    |       |
|           | 5y-OS | 25%           | 65%   | 28%   | 100%             | 38%                       |       |       |

HGSC-high-grade serous carcinoma, EC-endometrioid carcinoma, CCC-clear cell carcinoma, MC-mucinous carcinoma, LGSC-low-grade serous carcinoma. 5y-OS-five year overall survival rate.
